# Supplementary material
Source: PubMed Central journal article supplement (PMC2810547)
Supplement: NIHMS163787-supplement-01.pdf [file NIHMS163787-supplement-01.pdf]

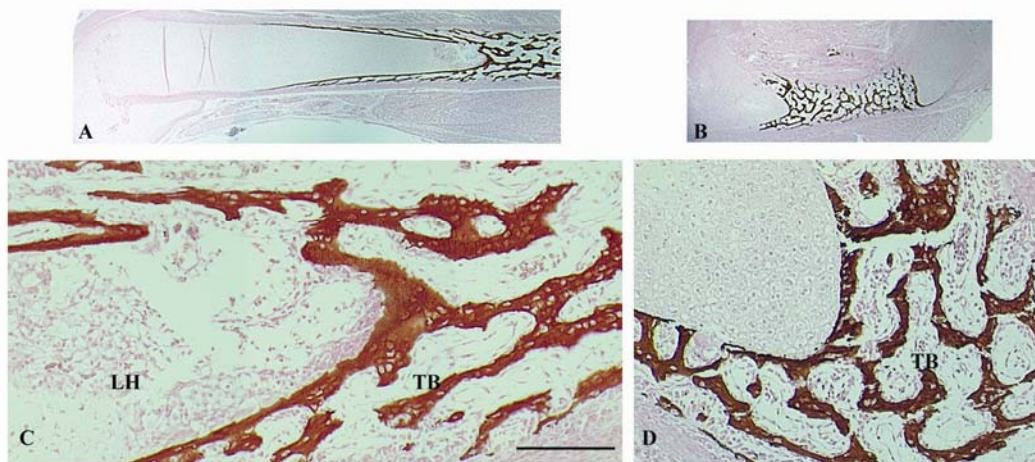

Figure S1. **Von Kossa staining of calcified matrix in E12 wt and nm tibia sections.** Lower-(A and B) and higher-magnification images (C and D) are shown. A, C: wt; B, D: nm Scale bar: 100 $\mu$ m
